# Supplementary material for: Eddy kinetic energy variability from 30 years of altimetry in the Mediterranean Sea
Source: Copernicus journal article supplement (doi:10.5194/os-22-549-2026), 2026-02-12
Supplement: Supplementary file [file os-22-549-2026-supplement-title-page.pdf › os-22-549-2026-supplement-title-page.pdf]

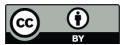

*Supplement of*

## **Eddy kinetic energy variability from 30 years of altimetry in the Mediterranean Sea**

**Paul Hargous et al.**

*Correspondence to:* Paul Hargous (hargous@imedeia.uib-csic.es)

- os-22-549-2026-supplement-title-page.pdf
- Supplements
  - Supplementary\_paper\_eke.pdf
  - video\_S1.mp4

The copyright of individual parts of the supplement might differ from the article licence.
